1 **Root water gates and not changes in root structure provide**  
2 **new insights into plant physiological responses and**  
3 **adaptations to drought, flooding and salinity**  
4  
5

6 Jean-Christophe Domec<sup>a,b</sup>, John S. King<sup>c</sup>, Mary J. Carmichael<sup>d</sup>, Anna Treado Overby<sup>e</sup>, Remi  
7 Wortemann R<sup>f</sup>, William K. Smith<sup>g</sup>, Guofang Miao<sup>h</sup>, Asko Noormets<sup>i</sup>, Daniel M. Johnson<sup>j</sup>  
8

9 **Institution addresses:**

10 <sup>a</sup>Bordeaux Sciences AGRO, UMR1391 ISPA INRA, 1 Cours du général de Gaulle 33175 Gradignan Cedex,  
11 France.

12 <sup>b</sup>Nicholas School of the Environment, Duke University, Durham, NC 27708, USA.

13 <sup>c</sup>Department of Forestry and Environmental Resources, North Carolina State University, Raleigh, NC  
14 27606, USA.

15 <sup>d</sup>Departments of Biology and Environmental Studies, Hollins University, Roanoke, VA 24020, USA.

16 <sup>e</sup>Planning, Design and the Built Environment, Clemson University, Clemson, SC 29634, USA.

17 <sup>f</sup>Université de Lorraine, INRA, UMR 1434 Silva, 54000, Nancy, France.

18 <sup>g</sup>Department of Biology, Wake Forest University, Winston-Salem, NC 27109, USA.

19 <sup>h</sup>School of Geographical Sciences, Fujian Normal University, Fuzhou, FJ-350007, P.R. China.

20 <sup>i</sup>Department of Ecology and Conservation Biology, Texas A&M University, College Station, TX 77843,  
21 USA.

22 <sup>j</sup>Warnell School of Forestry and Natural Resources, University of Georgia, Athens, GA 30602, USA.  
23

24 **Corresponding author:**

25 Jean-Christophe Domec / [jc.domec@duke.edu](mailto:jc.domec@duke.edu)  
26

27 **Running title:**

28 aquaporins regulate plant response to environmental stresses  
29

30 **Word count:**

31 Text body without M&M: 4361 words

32 7 figures, 6 in color.

33 2 Tables  
34

35 **Supplementary Data:** 3 Figures  
36  
37  
38

39 **Highlight**

40 New insights on organ hydraulics reveal that plant responses to drought, flooding and salinity is  
41 highly dynamic, reflecting a balance between species adaptive capacity and root aquaporin.

42

43 **Abstract**

44 The influence of aquaporin (AQP) activity on plant water movement remains unclear, especially  
45 in plants subject to unfavorable conditions. We applied a multitiered approach at a range of plant  
46 scales to (i) characterize the resistances controlling water transport under drought, flooding and  
47 flooding plus salinity conditions; (ii) quantify the respective effects of AQP activity and xylem  
48 structure on root ( $K_{\text{root}}$ ), stem ( $K_{\text{stem}}$ ) and leaf ( $K_{\text{leaf}}$ ) conductances, and (iii) evaluate the impact of  
49 AQP-regulated transport capacity on gas exchange. We found that drought, flooding and flooding-  
50 salinity reduced  $K_{\text{root}}$  and root AQP activity in *Pinus taeda*, whereas  $K_{\text{root}}$  of the flood-tolerant  
51 *Taxodium distichum* did not decline under flooding. The extent of the AQP-control of transport  
52 efficiency varied among organs and species, ranging from 35%-55% in  $K_{\text{root}}$  to 10%-30% in  $K_{\text{stem}}$   
53 and  $K_{\text{leaf}}$ . In response to treatments, AQP-mediated inhibition of  $K_{\text{root}}$  rather than changes in xylem  
54 acclimation controlled the fluctuations in  $K_{\text{root}}$ . The reduction in stomatal conductance and its  
55 sensitivity to vapor pressure deficit were direct responses to decreased whole-plant conductance  
56 triggered by lower  $K_{\text{root}}$  and larger resistance belowground. Our results provide new mechanistic  
57 and functional insights on plant hydraulics that are essential to quantifying the influences of future  
58 stress on ecosystem function.

59

60 **Key words:** aquaporin activity, anatomy, conductances, flooding, leaf water relations, plant  
61 hydraulics, water stress

62

63

64

65

66

## 67 **Introduction**

68 There is scientific consensus that the Earth's climate is changing at a geologically unprecedented  
69 rate and that human activities are a contributing factor, indicated by the National Academy of  
70 Sciences survey on climate change (NAS, 2020), and bolstered by a recent IPCC report  
71 (Oppenheimer et al., 2019). Due to a combination of seawater thermal expansion and melting of  
72 glaciers and polar ice sheets, global sea level rose 0.17 m over the 20<sup>th</sup> century and is projected to  
73 rise by at least 0.35 m by 2100 (Peltier, 2002). Coastal forests are among the world's most  
74 biologically diverse and productive ecosystems, but unfortunately are also the most vulnerable to  
75 sea level rise (SLR; Kirwan and Gedan, 2019). In addition to increased flooding, SLR is globally  
76 expected to foster high salinities into tributary freshwater areas of the coastal zones (Bhattachan  
77 et al., 2018). At the same time of being subject to increased salinity, those threatened ecosystems  
78 undergo periodic droughts exposing coastal forests to low soil water availability (DeSantis et al.,  
79 2007). Understanding forest responses to SLR therefore requires the determination of  
80 physiological response mechanisms to drought, flooding and flooding plus salinity.

81 Scientists have a broad-scale understanding of plant adjustment and tolerance to flooding  
82 and salinity along environmental gradients and the bulk of recent work in plants has been crucial  
83 in distinguishing adaptive plant strategies (Kirwan and Gedan, 2019). One of the most  
84 characteristic traits of wetland plants is aerenchyma, a specialized tissue made of intercellular gas-  
85 filled spaces that improves the storage and diffusion of oxygen. Overall, the physiological  
86 responses of plants to salt stress and flooding are similar in many ways (Allen et al., 1996; Munns,  
87 2002), but the mechanisms by which plants deal with these stressors differ across species (Munns  
88 and Tester, 2008). The main consensus is that the primary responses of plants to flooding and salt  
89 is inhibition of root hydraulic conductance (Loustau et al., 1995; Rodríguez-Gamir et al., 2012).

90 In turn, this reduction in water uptake capacity reduces photosynthesis and growth due to the  
91 closure of stomata (McLeod et al., 1996; Munns and Tester, 2008). However, there are no studies  
92 that have focused on variation in hydraulic traits in contrasting species in terms of adaptive  
93 strategies and root physiological responses to full inundation, limiting our understanding of how  
94 they are linked to leaf- and whole-plant-level water transport, which limits our ability to predict  
95 forest ecophysiological response to SLR and climate change.

96 Water flow in the soil-plant-atmosphere continuum (SPAC) is determined by the hydraulic  
97 conductance of soil and plant tissues, which characterizes the structural capacity of the whole plant  
98 to move water (Tyree and Zimmermann, 2002). Hydraulic conductance ( $K_{\text{plant}}$ ) is an important  
99 factor predicting gas exchange, transpiration, plant water status, growth rate and resistance to  
100 environmental stresses (Sperry, 2003; Addington et al., 2004; Brodribb and Holbrook, 2003;  
101 McCulloh et al., 2019). The partitioning of  $K_{\text{plant}}$  along the water transport path is very variable,  
102 not only among species, but also diurnally and among plant organs (Ye and Steudle, 2006; Johnson  
103 et al., 2016). Approximately 50-60% of the whole-plant hydraulic resistances ( $1/K_{\text{plant}}$ ) are located  
104 in the root system, which shows the outstanding importance of this organ within the flow path (see  
105 review by Tyree and Zimmermann 2002). Peripheral organs such as leaves and roots have been  
106 proposed as possible replaceable hydraulic fuses of the SPAC during stress, uncoupling stems  
107 hydraulically from transpiring surfaces and soil (Hacke et al., 2000; Sperry, 2003; Domec et al.,  
108 2009 Johnson et al., 2016). Quantifying the relative contribution of  $K_{\text{root}}$  to  $K_{\text{plant}}$  and how it varies  
109 under drought, flooding, and flooding plus salinity is thus essential for understanding how these  
110 stressors influence photosynthesis and stomatal conductance ( $g_s$ ) and their sensitivity to climatic  
111 variables. In addition, mechanistic depiction of variation in  $K_{\text{plant}}$  and its impact on  $g_s$ , and the

112 sensitivity of  $g_s$  to prominent environmental drivers, requires isolating the main resistances to plant  
113 water flow, and their dynamics in response to abiotic stress factors, which has rarely been done.

114 Most research on abiotic stresses has focused on aboveground organs and neglected  
115 physiological responses of the roots, especially in woody plants. This is surprising because  
116 important processes of plant tolerance are located in the roots and also because roots are the first  
117 organs to be affected by water stress, flooding and salinity (Krauss et al., 1999). In radial and axial  
118 roots axes, resistance to water flow depends on root anatomy (Knifer and Fricke, 2011), whereas  
119 in the radial component it is also a function of protein water channels, or aquaporins (AQP), that  
120 regulate the resistance of the transcellular pathway (Chaumont et al., 2005; Gambetta et al., 2017).  
121 Aquaporins are imbedded in the plasma and vacuolar membranes of most root cell types and form  
122 pores that are highly selective for water (Tornroth-Horsefield et al., 2006). In crop plants AQP  
123 chemical inhibitors (i.e. mercuric chloride or hydroxyl radicals) demonstrated that AQP down-  
124 regulation is the principal cause of alterations of the radial pathway, resulting in a decrease in  $K_{root}$   
125 (Ehlert et al., 2009; Knifer and Fricke, 2011; Maurel and Nacry 2020). Despite a recent flurry of  
126 studies, compared to reference plants used in molecular studies such as corn, tobacco and  
127 *Arabidopsis* (Siefritz et al., 2002; Lopez et al., 2003; Bramley et al., 2009; Sade et al., 2010; Tan  
128 and Zwiazek, 2019), the importance of species differences in AQP regulation in woody plants and  
129 its effect within the SPAC is still poorly understood (McElrone et al., 2007; Gambetta et al., 2013;  
130 Johnson et al., 2014; Rodriguez-Gamir et al., 2019).

131 Better information on physiological functioning of forest species in stressed environments  
132 is needed to develop adaptive management strategies that will help protect threatened coastal  
133 ecosystems (Carmichael and Smith, 2016). To fully understand the impacts of SLR on plant  
134 adaptation, the influence of abiotic stresses on root hydraulics must be evaluated with respect to

135 the entire capacity of the plant to move water. This is especially relevant for seedlings, which have  
136 low physiological capacity to tolerate many stressors (Niinemets, 2010), impacting species  
137 persistence under changing conditions (Megonigal and Day, 1992; Brodersen et al., 2019). In that  
138 framework, our first objective was to characterize the vascular conductances that control water  
139 movement through the plant system under drought, flooding, and flooding plus salinity stresses.  
140 Our second objective was to quantify the effects of AQP activity on plant organs and partition the  
141 antagonistic effects of AQP and xylem structure on conductances. Our third objective was to  
142 evaluate a hypothesized correlation between leaf-level gas exchange and AQP regulation of water  
143 transport under varying environmental conditions. Using contrasting species, we tested the  
144 hypotheses that decrease in hydraulic conductance between treatments 1) is controlled by AQP  
145 activity rather than by a change in root xylem structure with greater declines in stress-intolerant  
146 plants, and in roots than in stems and leaves; and 2) is optimized in plants experiencing lower AQP  
147 inhibition, such that  $K_{\text{root}}$  exerts greater control on  $K_{\text{plant}}$ , which in turn affect  $g_s$  and carbon  
148 assimilation when environmentally stressed.

149

## 150 **Material and Methods**

### 151 **Plant material and greenhouse experiments**

152 We used 50 one-year-old *Taxodium distichum* L. and *Pinus taeda* L. half-sib seedlings supplied  
153 by ArborGen Inc. (Ridgeville, SC, USA). At the beginning of the spring season (late March), the  
154 seedlings were repotted in 19 liters commercial plant pots filled with a Fafard-4P soil mixture  
155 composed of sphagnum peat moss (50%), bark (25%), vermiculite (15%) and perlite (Fafard Inc.,  
156 Agawam, MA, USA). This mixture was representative of the soil texture and organic matter  
157 content of soils found in coastal forested wetlands. Potted plants were maintained in a greenhouse

158 with a 16-h photoperiod where daytime mean temperature and relative humidity were kept at  $23 \pm 3$   
159  $^{\circ}\text{C}$  and  $55 \pm 6\%$ , respectively. Before the treatments were applied, all 50 plants were watered three  
160 times a week. Eight weeks after the beginning of the experiment 36 plants were randomly separated  
161 into four groups (control, droughted, flooded, flooded plus salt) and were surrounded and buffered  
162 by the 14 plants that were not used for the measurements. These treatments were intended to  
163 represent stresses related to SLR and periodic droughts exposing coastal forests, and thus the soil  
164 salinity treatment with no flooding was not studied. Those single-factor experiments were  
165 conducted simultaneously and applied for 35 days (Rodriguez-Gamir et al., 2019). Control plants  
166 were irrigated with 2 liters of water twice per week, which was enough to saturate the substrate.  
167 For the drought treatment, plants were never irrigated from the start until the end of the experiment  
168 (Rodriguez-Gamir et al., 2019). Flooding and flooding plus salinity was imposed by submerging  
169 the seedlings to the root-collar (3 cm above the surface) without draining the pots (Pezeshki, 1992).  
170 The salinity treatment (at a concentration of  $4 \text{ g l}^{-1}$ , or 4 parts per thousand) was prepared using a  
171 commercial seawater mixture ( $24 \text{ g l}^{-1} \text{ NaCl}$ ;  $11 \text{ g l}^{-1} \text{ MgCl}_2 \cdot 6\text{H}_2\text{O}$ ;  $4 \text{ g l}^{-1} \text{ Na}_2\text{SO}_4$ ;  $2 \text{ g l}^{-1} \text{ CaCl}_2 \cdot$   
172  $6\text{H}_2\text{O}$ ;  $0.7 \text{ g l}^{-1} \text{ KCl}$ ).

173

#### 174 **Hydraulic conductance of root, shoot and whole plant**

175 Five weeks after the treatments were applied, root ( $K_{\text{root}}$ ), shoot ( $K_{\text{shoot}}$ ) and stem ( $K_{\text{stem}}$ ) hydraulic  
176 conductance were directly measured using a Hydraulic Conductance Flow Meter (HCFM; Tyree  
177 et al., 1993) (Dynamax Inc., Houston, TX, USA). Hydraulic parameters were determined in six  
178 loblolly pine and five bald cypress seedlings per treatment, and conductance values for a given  
179 plant were obtained from the same plant. To minimize the potential impact of diurnal periodicity  
180 on hydraulic conductance, all measurements were taken between 1000 hrs and 1200 hrs and under

181 the same environmental conditions (temperature of 22 °C, and relative humidity of 60%). During  
182 HCFM measurements, the leaves were submerged in water to maintain constant temperature and  
183 prevent transpiration. To measure  $K_{\text{root}}$  and  $K_{\text{shoot}}$  the plants were cut 5 cm above the soil surface  
184 and the cut ends of the shoots and roots were connected to the HCFM. This instrument perfuses  
185 degassed water through root or shoot system by applying pressure to a water-filled bladder  
186 contained within the unit.  $K_{\text{root}}$  was determined between 2 and 4 minutes after shoot decapitation,  
187 thus minimizing measurement errors to less than 10% (Vandeleur et al. 2014; Rodriguez-Gamir et  
188 al., 2019; see also Supplementary Figure 1). The flow rate of water through root or shoot was  
189 determined under transient mode (Yang and Tyree, 1994), which consists in measuring flow rate  
190 under increasing pressure applied by a nitrogen gas cylinder. Transients were also performed on  
191 shoots after removal of leaves to determine  $K_{\text{stem}}$ . The applied pressure gradually rose from 0 to  
192 450 kPa over the course of approximately 1 minute and the flow rate at each pressure value was  
193 logged every 2 seconds using the Dynamax software. Hydraulic conductance ( $K$ ) was then  
194 calculated using the formula:  $K=Q_v/P$ ; where  $Q_v$  is the volumetric flow rate ( $\text{kg s}^{-1}$ ) and  $P$  is the  
195 applied pressure (MPa). Hydraulic conductance was standardized to values for 25 °C to account  
196 for the effects of temperature on water viscosity. Because the HCFM operates under high pressure,  
197 the measured  $K_{\text{root}}$  and  $K_{\text{shoot}}$  represent maximum values of conductances, that is in the absence of  
198 embolized conduits. At the end of the measurements, all-sided leaf area of the shoots was  
199 determined with an LI-3100 leaf area meter (Li-Cor, Inc., Lincoln, NE, USA), and conductance  
200 values were expressed on leaf specific area basis (Yang and Tyree, 1994). All plant biomass  
201 fractions were then harvested and dried at 70°C for 48 hours and weighed. Further, mass-specific  
202 root hydraulic conductance ( $K_{\text{root-biomass}}$ ) was calculated by normalizing  $K_{\text{root}}$  by root dry mass.



203 Root (two opposite lateral roots per seedling taken about 2.5 cm down from the root collar  
204 were sampled) and stem tracheids were visualized by perfusing the decapitated samples with 0.1%  
205 toluidine blue and imaged at 90-180x magnification using a digital camera mounted on a widefield  
206 zoom stereo microscope (ZM-4TW3-FOR-9M AmScope, USA). Tracheid diameter was measured  
207 along four 4 radials rows per sample using an image analysis software (Motic Images version 3.2,  
208 Motic Corporation, China). In addition, the presence or absence of aerenchyma was assessed on 4  
209 lateral roots per sample, which included the two used for tracheid size determination (no  
210 aerenchyma was present in the stems).

211 Whole plant hydraulic resistance was calculated as in Domec *et al.* (2016)

$$212 \quad 1/K_{\text{plant}}=1/K_{\text{root}}+1/K_{\text{shoot}} \quad (1)$$

213 and resistances of the shoot components ( $1/K_{\text{stem}}$  and  $1/K_{\text{leaf}}$ ) were calculated from the difference  
214 between resistances before and after removal of each leaf. Hydraulic conductance and resistance  
215 are reciprocals, and the latter is used for partitioning the resistances in the root-to-leaf continuum,  
216 and the former for examining the coordination between plant hydraulics and gas exchange.

217

### 218 **Aquaporin contribution to hydraulic conductances**

219 We quantified the AQP contribution to  $K_{\text{root}}$  and  $K_{\text{shoot}}$  (and its components) and  $K_{\text{plant}}$  using  
220 hydroxyl radicals (\*OH) produced using the Fenton reaction (solution made by equal mixing of  
221 0.6 mM H<sub>2</sub>O<sub>2</sub> and 3mM FeSO<sub>4</sub>) to inhibit AQP activity (Ye and Steudle, 2006; McElrone et al.,  
222 2007). Hydroxyl radicals has been shown to be less toxic and above all more effective in blocking  
223 water channels than mercuric chloride (Henzler and Steudle, 2004). Conductances with AQP  
224 function inhibited were measured by introducing approximately 18 ml of \*OH solution, instead of  
225 water, into the existing compression couplings connected to the sample and the HCFM (McElrone

226 et al. 2007; Johnson et al. 2014). As previously measured (Almeida-Rodriguez, Hacke and Laur  
227 2011; Rodriguez-Gamir et al., 2019), the effect of \*OH on conductivity was effective and  
228 reversible in less than 6 minutes when radicals were replaced with distilled water (Supplementary  
229 Fig. 1). Six transient curves per sample were constructed with the HCFM: two before inhibiting  
230 AQP activity, two after AQP inhibition, and two final ones after flushing the samples with water  
231 only to reassessed flow rate with no AQP inhibition. We calculated the AQP contribution to  $K_{\text{root}}$ ,  
232  $K_{\text{shoot}}$  ( $K_{\text{stem}}$  and  $K_{\text{leaf}}$ ) and  $K_{\text{plant}}$  as the difference between initial conductance and conductance  
233 after AQP inhibition, divided by the initial conductance (Rodriguez-Gamir et al., 2019).

234 From measurements of conductances before and after inhibiting AQP activity, we were  
235 able to calculate whether the departure in values from control was due to either the xylem-only  
236 (structural changes in xylem conduits) or the AQP-only part of the hydraulic pathway. For a given  
237 stress applied, the structural part of the hydraulic pathway reducing conductance was calculated  
238 by dividing the difference in conductance between control and treatment after inhibiting AQP  
239 activity by the difference in conductance between control and treatment without inhibiting AQP  
240 activity. The AQP effect was taken as 1 minus the structural effect.

241

## 242 **Gas exchange and water potential**

243 Net photosynthesis ( $A$ ) and stomatal conductance ( $g_s$ ) were measured with a Li-Cor 6400 (Li-Cor,  
244 Inc., Lincoln, NE, USA). For each leaf, the chamber was set to match prevailing environmental  
245 conditions assessed immediately prior to the measurement: atmospheric  $\text{CO}_2$  concentration (390-  
246 410 ppm), relative humidity (46-59 %), photosynthetically active radiation (PAR; 1600-1800  $\mu\text{mol}$   
247  $\text{m}^{-2} \text{s}^{-1}$ ), and leaf temperature (21-26 °C). All gas exchange results were expressed on an all-sided  
248 leaf area basis, and only fully-expanded healthy-appearing needles of the same age were picked

249 for analysis. Maximum (light saturated) photosynthetic capacity ( $A_{\text{sat}}$ ) was measured on 4 green  
250 branchlets needles per seedling grown in the upper third of the plants. Immediately after the gas  
251 exchange measurements were performed, leaf water potential ( $\Psi_{\text{leaf}}$ ) was measured using a pressure  
252 chamber (PMS Ins., Albany, OR, USA). To assess maximum (least negative)  $\Psi_{\text{leaf}}$ , two branchlets  
253 per individual from each treatment were sampled at predawn (between 05:00 hrs and 06:00 hrs).

254 Net photosynthesis versus intercellular  $\text{CO}_2$  concentrations (A-Ci curves) were measured  
255 at 25 °C leaf temperature, 60±10 % relative humidity and 1600  $\mu\text{mol m}^{-2} \text{s}^{-1}$  PAR. The chamber  
256  $\text{CO}_2$  concentrations were set to ambient and sequentially lowered to 50 ppm and then to 1500 ppm.  
257 These data were used to estimate the maximum Rubisco carboxylation ( $V_{\text{cmax}25}$ ), the maximum  
258 electron transport ( $J_{\text{max}25}$ ), and the dark respiration ( $R_{\text{d}25}$ ) rates according to Farquhar et al. (1980).

259

## 260 **Field hydraulic and canopy conductance**

261 Two contrasting sites were used to determine field values of  $K_{\text{plant}}$  and  $g_s$  under typical field  
262 conditions, droughted and flooded conditions of large trees growing in intact forests. Soil salinity  
263 never occurred at the field sites to our knowledge. The first study site is a forested wetland located  
264 at the Alligator River National Wildlife Refuge, on the Albemarle–Pamlico Peninsula of North  
265 Carolina, USA (35°47'N, 75°54'W). This research site was established in November 2008, and  
266 includes a 35-m instrumented tower for eddy covariance flux measurements, a  
267 micrometeorological station, and 13 vegetation plots spread over a 4km<sup>2</sup> area (Miao et al. 2013;  
268 Domec et al., 2015). The forest type is mixed hardwood swamp forest (>100-year-old); the  
269 overstory is predominantly composed of water tupelo (*Nyssa aquatica* L.) that represents 39% of  
270 the basal area and an even mix of red maple (*Acer rubrum* L.), bald cypress and loblolly pine. The

271 canopy of this site is fairly uniform with heights ranging from 16 m to 21 m, and with leaf area  
272 index peaking at  $4.0 \pm 0.3$  in early July.

273 The second, drier site ( $35^{\circ}11'N$ ,  $76^{\circ}11'W$ ) located within the lower coastal plain, mixed  
274 forest province of North Carolina (Domec et al., 2009). This 100-ha mid-rotation (23-year-old)  
275 loblolly pine stand (US-NC2 in the Ameriflux database) was established in 1992 and has an  
276 understory comprised of other woody species such as sparse red maple and bald cypress trees.  
277 Artificial drainage lowers the height of the water table, improving site access and increases  
278 productivity, especially during winter months (Domec et al., 2015).

279 At both sites, canopy conductance was derived from sapflow measurements and thus  
280 comprises the total water vapor transfer conductance from the 'average' stomata of the canopy.  
281 Sapflow was measured at breast height using thermal dissipation probes inserted in two flood-  
282 adapted species (bald cypress and water tupelo) and two others not adapted to flooding (red maple  
283 and loblolly pine) (see Domec et al., 2015 for further description of the sites and the methodology  
284 used). Note that water tupelo was only present at the wetland site. Stomatal conductance of the  
285 plants measured in the field was calculated from transpiration and vapor pressure deficit (VPD),  
286 using the simplification of the inversion of Penman–Monteith model (Ward et al., 2013). To  
287 analyze the effect of  $K_{\text{plant}}$  on  $g_s$ ,  $K_{\text{plant}}$  from field and greenhouse samples was calculated from the  
288 slope of the relationship between diurnal variation in  $\Psi_{\text{leaf}}$  and transpiration (Loustau et al., 1995).  
289 Changes in  $\Psi_{\text{leaf}}$  from dawn to mid-afternoon were quantified with a pressure chamber (PMS,  
290 Albany, OR) on six to eight leaves collected from each tree equipped with sapflow sensors

291 Oren et al. (1999) showed that under saturated light, the decrease in  $g_s$  with increasing VPD  
292 is proportional to  $g_s$  at low VPD. Therefore, the sensitivity of the stomatal response to VPD when

293 PAR was above 800  $\mu\text{mol m}^{-2} \text{s}^{-1}$  (light-saturated  $g_s$ ) was determined by fitting the data to the  
294 functional form:

$$295 \quad g_s = b - a \ln(\text{VPD}) \quad (2)$$

296 where  $b$  is  $g_s$  at  $\text{VPD} = 1$  kPa (hereafter designated as reference or maximum canopy-averaged  
297 stomatal conductance,  $g_{s\text{-max}}$ ), and  $a$  is the rate of stomatal closure and reflects the sensitivity of  $g_s$   
298 to VPD [ $dg_s/d\ln\text{VPD}$ , in  $\text{mmol m}^{-2} \text{s}^{-1} \ln(\text{kPa})^{-1}$ ]. We propose to use this framework where VPD  
299 and light intensity are fixed to investigate the nature of the relationship between  $K_{\text{plant}}$  and  $g_{s\text{-max}}$ ,  
300 and how this relationship affects the sensitivity of  $g_s$  to VPD.

301

## 302 **Statistical analyses**

303 All measured parameters were tested using multiple analysis of variance with species, treatments,  
304 and AQP activity taken as factors. Mean separation was performed using the Tukey's procedure at  
305 95 % confidence level. Statistical analyses were run using SAS (Version 9.4, Cary, NC, USA) and  
306 curve fits using SigmaPlot (version 12.5, SPSS Inc. San Rafael, CA, USA).

307

## 308 **Results**

### 309 **Plant biomass**

310 All treatments significantly reduced loblolly pine (*Pinus taeda* L.) total biomass ( $p < 0.01$ ; Table  
311 1), whereas for the flood-tolerant bald cypress (*Taxodium distichum* L.) only the drought and the  
312 flooded plus salinity treatments had a negative effect on growth ( $p < 0.037$ ). This decrease in plant  
313 growth was mainly attributed to a reduction in root and stem biomass in bald cypress ( $p < 0.032$ ),  
314 and in leaf and stem biomass in loblolly pine ( $p < 0.01$ ). Despite this reduction in plant size, the  
315 fine root to leaf mass ratio of bald cypress was only affected in the flooding plus salinity treatment,

316 whereas in loblolly pine it was stimulated by 25% and 55% in the flooding and the flooding plus  
317 salinity conditions, respectively. All stresses decreased leaf mass per area (LMA) in loblolly pine  
318 ( $p < 0.02$ ). In bald cypress LMA was only negatively affected by the drought and by the flooded  
319 plus salinity treatments ( $p < 0.01$ ). Field measurements indicated that unlike loblolly pine and red  
320 maple (*Acer rubrum* L.), flooded bald cypress and water tupelo (*Nyssa aquatica* L.) grew as rapidly  
321 ( $p > 0.65$ ) as trees subjected to periodic or non-flooded conditions (Supplementary Fig. 2).

322

### 323 **Effect of flooding and salinity on the partitioning of hydraulic conductance**

324 All treatments decreased whole-plant hydraulic conductance ( $K_{\text{plant}}$ ) in loblolly pine ( $p < 0.05$ ),  
325 whereas bald cypress was only affected by the drought and the flooding plus salinity treatment  
326 (Fig. 1). In both species the strongest decrease in root ( $K_{\text{root}}$ ) and shoot ( $K_{\text{shoot}}$ ) hydraulic  
327 conductances were measured for plants subjected to flooding plus salinity. It should be noted that  
328 flooding alone did not affect any of the conductances in bald cypress. When loblolly pines were  
329 flooded, even  $K_{\text{root}}$  on a root-mass basis ( $K_{\text{root\_biomass}}$ ) dropped significantly (by 45%), whereas  $K_{\text{root}}$   
330 or  $K_{\text{root\_biomass}}$  of the flood-tolerant bald cypress did not (Table 2; Fig. 1).

331 The overall decline in  $K_{\text{plant}}$  was mainly driven by an increase in root and stem resistances  
332 in loblolly pine, and by root resistance only in bald cypress (Fig. 2). Under control conditions,  
333 roots represented between 35% and 45% of whole-plant resistance ( $1/K_{\text{plant}}$ ), and under treatments  
334 this partitioning increased to more than 50% ( $p = 0.038$ ) in loblolly pine, which was paralleled by  
335 a reduction in leaf resistance from 35% to 15% ( $p = 0.023$ ). In bald cypress, only the flooded plus  
336 salt treatment increased the predominance of root resistance, which was accompanied by a  
337 decrease in the contribution of leaf and stem to the overall whole-plant resistance.

338

### 339 **Aquaporin contribution to plant organ conductances and gas exchanges**

340 The reduction in  $K_{\text{root}}$  and  $K_{\text{plant}}$  between control and the other treatments (Fig. 2) was mainly  
341 caused by a reduction in AQP activity rather than by a change in root anatomy (Table 1; Fig. 3).  
342 Even when  $K_{\text{root}}$  was calculated on a root-biomass basis ( $K_{\text{root-biomass}}$ ), the inhibition of AQP activity  
343 led to similar values of  $K_{\text{root-biomass}}$  (AQP-inhibited  $K_{\text{root\_biomass}}$  in Table 2) across all treatments  
344 ( $p>0.47$ ) in bald cypress, and for the flooded treatment ( $p=0.87$ ) in loblolly pine. Nonetheless, in  
345 loblolly pine seedlings, AQP-inhibited  $K_{\text{root\_biomass}}$  decreased by 31% ( $p=0.042$ ) and 45 %  
346 ( $p=0.028$ ) in the drought and flooded plus salt treatments, respectively, but that was still less than  
347 the overall reduction in  $K_{\text{root\_biomass}}$  (52 % and 66 %, respectively), indicating that changes in  
348  $K_{\text{root\_biomass}}$  were mostly driven by the inhibition of AQP. This reduction in  $K_{\text{root\_biomass}}$  in loblolly  
349 pine mirrored the decrease in root and stem tracheid diameter in the drought and flooded plus salt  
350 treatments (Table 1). In bald cypress, tracheid size was not affected by treatment, but aerenchyma  
351 production was stimulated under flooded conditions (Table 1).

352 While blockage of AQP reduced hydraulic conductance, the extent of the decrease varied  
353 among organs and species (Fig. 3). Root AQP activity in loblolly pine decreased ( $p<0.001$ ) from  
354 42 % under controlled conditions, to less than 5-17 % in the different treatments, which was the  
355 driver of the decline in whole-plant AQP contribution (Fig. 4A). In this species, we found that  
356 flooding and flooding plus salinity reduced the AQP activity of the whole plants from 32 % to less  
357 than 6 % ( $p<0.01$ ). In bald cypress only the drought and flooded plus salt treatments reduced  
358 ( $p<0.02$ ) AQP contribution to  $K_{\text{root}}$  or  $K_{\text{plant}}$  (Fig. 4B). For that species, the inhibition of AQP in  
359 the flooding treatment did not affect ( $p=0.95$ )  $K_{\text{root}}$  or  $K_{\text{leaf}}$ . In both species, drought also had a  
360 significant effect on AQP contribution to  $K_{\text{leaf}}$  with a decrease from 17 % to 9 % ( $p<0.03$ ) in  
361 loblolly pine, and from 44 % to 23 % ( $p<0.001$ ) in bald cypress. In both species there was no  
362 treatment effect on the contribution of AQP activity to  $K_{\text{stem}}$  ( $p>0.42$ ).

363 Maximum stomatal conductance ( $g_{s-max}$ ; i.e.  $g_s$  measured at a reference VPD of 1kPa and  
364 under saturated light) for bald cypress was only negatively affected by drought and the flooding  
365 plus salt treatment (Table 2). In loblolly pines,  $g_{s-max}$  differed under flooded and flooded plus salt  
366 treatments, experiencing the smallest and the largest stomatal closure, respectively. Photosynthetic  
367 rate of both species was also negatively affected by treatments ( $p<0.04$ ), with the strongest  
368 reduction for the drought and flooded-salt treatments (Table 2). The disruption of photosynthesis  
369 concurred with a reduction in rubisco carboxylating enzyme activities and maximum electron  
370 transport rate ( $VC_{max25}$  and  $J_{max25}$ , respectively; Table 2). Similarly, across species dark respiration  
371 rates were only affected by the flooded plus salt treatments.

372 After taking into account the effect of VPD on  $g_s$ ,  $K_{plant}$  had a major influence on  $g_{s-max}$  at  
373 field conditions. Across species and treatments, and whether plants were from the greenhouse or  
374 grown in the field, a 50% reduction in  $K_{plant}$  was accompanied by a 37 % decline in  $g_{s-max}$  (Fig.  
375 5A). There was indeed no difference ( $p=0.33$ ) in the relationship between  $g_{s-max}$  and  $K_{plant}$  for  
376 seedlings growing in greenhouse and mature trees in the field. Species differences were apparent  
377 in  $K_{plant}$ , with higher values in bald cypress and red maple. Flooded loblolly pine exhibited the  
378 same level of reduced  $K_{plant}$  as water-stressed plants. In red maple, permanently flooded conditions  
379 reduced water uptake capacity more than two-fold, and this species exhibited higher hydraulic  
380 limitation and  $g_{s-max}$  in flooded than in drought-stressed conditions. However, bald cypress and  
381 water tupelo (circles and diamonds in Fig. 5A, respectively), which are species found in  
382 permanently wet soils, did not experience more than 15 % decline in  $g_{s-max}$  under flooded  
383 conditions. The sensitivity of  $g_s$  to VPD was linearly related to  $g_{s-max}$  (Fig. 5B) and  $K_{plant}$   
384 (Supplementary Fig. 3). Stomatal conductance declined in response to increasing VPD, and the  
385 magnitude of the reduction varied over the measurement period as shown by the decline in  $g_{s-max}$ .



386 The slope of the relationship between  $g_{s\_max}$  and the sensitivity of  $g_s$  to VPD ( $0.62 \pm 0.04$ ) was not  
387 different ( $p > 0.99$ ) than the previously reported generic value of 0.60 based on a hydraulic model  
388 that assumes tight stomatal regulation of  $\Psi_{leaf}$  (Oren et al., 1999).

389 Maximum  $g_s$  and stomatal sensitivity to VPD decreased linearly with increasing the  
390 contribution of root hydraulic resistance ( $1/K_{root}$ ) to  $1/K_{plant}$  for both species (Fig. 6). Those  
391 negative relationships appeared also to be identical across treatments with a 50 % increase in  
392 resistance belowground resulting in a 56 % reduction in  $g_{s\_max}$  and in a 65 % decrease in stomatal  
393 sensitivity to VPD.

394 The decrease in  $g_{s\_max}$  and  $A_{sat}$  were linked to a decrease in AQP contribution to root  
395 conductance among treatments and also species ( $p < 0.039$ ; Fig. 7). Although weaker, those  
396 relationships still held when whole-plant AQP activity was compared to gas exchange, and a 25  
397 % decrease in AQP contribution to  $K_{plant}$  was predicted to reduce  $g_{s\_max}$  by 38% and  $A_{sat}$  by 30 %.

398

## 399 **Discussion**

400 In US coastal regions from Maryland to Texas that are vulnerable to SLR (Titus and Richman,  
401 2001; Kirwan and Gedan, 2019), many species such as bald cypress, water tupelo, red maple and  
402 loblolly pine are ecologically dominant and commercially important. The first two species are fully  
403 adapted to partial or total soil flooding and the other species are common to forest communities of  
404 estuarine woodlands (Pezeshki, 1992; Keeland and Sharitz, 1995). Bald cypress seedlings  
405 generally tolerate flooding, but marked with an initial reduction in growth (Allen et al., 1996).  
406 However, within 3 to 5 years, seedlings generally recover from the stress imposed by developing  
407 pneumatophores (Megonigal and Day, 1992), explaining why flooded trees may grow as rapidly  
408 as trees subjected to non-flooded conditions (Supplementary Fig. 2). However, before this root

409 formation occurs, the influence of AQP on control of plant water movement and gas exchanges is  
410 needed and reflected in our results (Fig 4; Fig.7).

411

### 412 **Aquaporin activity appears to be essential in species-specific tolerance to stress**

413 Our results highlight the integrated nature of hydraulics across the whole plant and emphasized  
414 the contributions of structural and physiological components to conductance (Bramley et al., 2009;  
415 Maurel and Nacry, 2020). Drought, flooding and flooding plus salinity treatments caused a  
416 significant shift in hydraulic resistance away from stem and leaves to the roots, because of  
417 differential transmembrane AQP activity and not because of changes in the apoplastic hydraulic  
418 pathway (xylem diameter) (Table 1, Fig. 3 and see AQP-inhibited  $K_{\text{root\_biomass}}$  in Table 2). During  
419 stress, some structural and anatomical changes also occurred as seen by the decrease in either leaf,  
420 stem or root biomass under drought or flooded plus salt treatments, affecting for the latter treatment  
421 root to leaf area ratio in both species (Table 1). However and unlike the role played by AQP, those  
422 structural changes provided only minute adjustments in xylem hydraulic conductance  
423 (conductance once AQP activity was inhibited) and did not explain the whole decrease in  
424 conductance and thus the physiological mechanisms controlling water transport through the root  
425 (Table 2; Fig. 3). Both loblolly pine and bald cypress were highly susceptible to the combined  
426 stress of flooding plus salinity which lends support to the role of saltwater intrusion in the  
427 formation of coastal ghost forests, since bald cypress is also dying in these forests (Kirwan and  
428 Gedan, 2019). Lower predawn  $\Psi_{\text{leaf}}$  were expected with higher salinity because the lower osmotic  
429 potential of the medium (4 ppm corresponding to an osmotic potential of 0.31 MPa) likely  
430 increased leaf tissue ionic concentration (Allen et al., 1996). This excess of ions disrupted  
431 photosynthesis and inhibited carboxylating enzyme activities (Table 2), which in turn contributed

432 to inhibited root or leaf growth, and the production of new aerenchymatous roots in the flood-  
433 adapted species (Table 1).

434         These findings may shed light on the adaptive advantages of altering AQP activity in  
435 response to environmental stresses (Maurel and Nacry, 2020). Regarding drought, lowering AQP  
436 activity in roots should lead to larger  $\Psi_{\text{leaf}}$  gradients, inducing stomata to close more rapidly.  
437 Reducing water channel activity can then be seen as a means to reduce water loss when soil water  
438 availability is low (McLean et al., 2011). In the case of flooding, the resulting decrease in  $K_{\text{root}}$   
439 observed in the flood-intolerant species (such as loblolly pine used here) could also limit water  
440 transport to the leaves, causing stomatal closure and thus protecting the integrity of the whole  
441 hydraulic system until non-stressed conditions resume (Else et al., 2001). Loblolly pine is known  
442 to be tolerant to low salinity and short-term flooding (Poulter et al., 2008), and our experiment  
443 showed that this species reduced significantly gas exchange under these conditions, but to levels  
444 that were not lethal (Table 2). The negative impact of flooding on plants is a consequence of the  
445 low solubility of oxygen in water (Leyton and Rousseau, 1958), leading to anoxia (Kozłowski,  
446 1997). The tight coupling of AQP functioning to the drop in cell energy (due to oxygen deprivation  
447 and acidosis) suggests that short-term adjustments in tissue hydraulics are critically needed during  
448 the early stages of the anoxic stress to balance water uptake with water loss (Tan et al., 2019).  
449 Long-term metabolic adaptation to flooding is generally characterized by the decrease in  
450 belowground biomass to limit oxygen deficiency, but one of the most adaptive features of plants  
451 of wetland ecosystems is aerenchymatous tissues characterized by intercellular gas-filled spaces  
452 that improve the storage and diffusion of oxygen. Unlike the adjustment in root biomass or xylem  
453 anatomy that can take more than 2 months (Krauss et al., 1999) and was not observed in any of  
454 the two seedlings (Table 1), intercellular air spaces, which were present after 5 weeks of flooding

455 in bald cypress, likely played a vital role in maintaining root uptake and preventing the AQP-  
456 mediated reduction in  $K_{\text{root}}$ . Kamaluddin and Zwiazek (2002) and Holbrook and Zwieniecki (2003)  
457 have also proposed that anoxia-induced AQP down-regulation may prevent the transport of  
458 ethylene precursors away from the root, thereby favoring the accumulation of ethylene to trigger  
459 the differentiation of root aerenchymas, especially in adapted species such as bald cypress (Table  
460 1). Salinity added to the flooding stress may trigger larger AQP inhibition, so that advective salt  
461 flow to the root surface may be minimized (Azaizeh and Steudle, 1991). In the short term (a few  
462 hours following exposure to flooding or flooding plus salinity), it has been shown that plants  
463 respond to osmotic shock by reduced AQP activity (Martinez-Ballesta et al., 2000; Rodríguez-  
464 Gamir et al., 2012), which in our case was followed by reduced  $K_{\text{root}}$ , most likely as an adaptive  
465 strategy to eliminate water loss from the roots under conditions of low osmotic potential.

466 Finally, it can also be hypothesized that the role of AQP may in fact not concern the primary  
467 response of the plant to stress, but its recovery performance (Siefritz et al., 2002). Stimulation of  
468 specific AQP suggested that “gating” in response to salt stress involved not only the reduction in  
469 water channels, but also an enhancement in the internalization of specific AQPs (raft-associated  
470 pathway), putatively becoming active once stress is relieved (Li et al., 2011).

471

## 472 **Root hydraulics as related to whole plant water transport and gas exchange**

473 One of the objectives of our study was to evaluate a hypothesized correlation between leaf gas  
474 exchange and root hydraulics as influenced by AQP activity. The decline in  $g_{s\_max}$  (and its  
475 sensitivity to VPD) and photosynthesis was strongly related to the increase in root resistance due  
476 to a decrease in AQP contribution to  $K_{\text{root}}$ , with a common relationship found among the species  
477 despite important differences in treatment responses (Figs. 6 and 7). In non woody plants, it has

478 been suggested that abscisic acid (ABA) accumulation in leaves may be responsible for stomatal  
479 closure in flooded plants (Castonguay et al., 1993; Else et al., 2001). However, in woody plants  
480 the marked reduction in  $g_s$  in flooded seedlings does not seem to be induced by ABA, since a  
481 significant reduction in  $g_s$  appeared a week after stressors were applied (unpublished data;  
482 Rodríguez-Gamir et al., 2012), whereas the increase in ABA in leaves is generally detected 4-5  
483 weeks later (Zhang and Zhang, 1994; Rodríguez-Gamir et al., 2012). Maximum  $g_s$  and  $K_{plant}$  were  
484 tightly coordinated in plants growing in the field or in greenhouse (Fig. 5). Changes in  $K_{plant}$ , driven  
485 by  $K_{root}$ , imposed a decline in  $g_{s\_max}$ , thus affecting leaf water status and further increases in  
486 transpirational water loss and carbon assimilation. Midday  $\Psi_{leaf}$  did not change during the flooding  
487 treatment, highlighting the adaptive role of stomatal closure in counteracting leaf dehydration  
488 (Meinzer, 2003). Furthermore, our data indicate that flooded pines exhibited the same level of  
489 reduced  $K_{plant}$  as water stressed plants. Field data showed that red maple exhibited higher hydraulic  
490 limitation and higher  $g_{s\_max}$  in flooded than in water stressed conditions, indicating that species  
491 differences exist in the response to flooding. In contrast, bald cypress and water tupelo regulated  
492 very efficiently the closure of stomata, thus adjusting the evaporative water losses to the water  
493 uptake capacity of roots and the resulting decrease in  $K_{plant}$  (Fig. 5).

494 Our results also showed that the sensitivity of  $g_s$  to VPD was mostly attributable to the  
495 variation in  $g_{s\_max}$ , which is consistent with the isohydric regulation of  $\Psi_{leaf}$  induced by  $K_{plant}$  (Oren  
496 et al., 1999). Stomata responded to VPD in a manner consistent with protecting xylem integrity  
497 and thus the capacity for water transport (Domec et al., 2009; McCulloh et al., 2019). Future  
498 climate change is expected to increase temperature and therefore VPD in many regions  
499 (Oppenheimer et al., 2019). Stomatal acclimation to VPD as affected by drought, flooding and  
500 flooding plus salinity could potentially have a large impact on the global water and carbon cycles.

501 Here we measured that in forested wetlands global plant transpiration responses to future climate  
502 will probably not differ from expectations based on the well-known relationship between  $g_s$  and  
503 VPD (Oren et al., 1999). To improve climate predictions of warming effects on transpiration for  
504 plants subjected to different abiotic stresses, our results indicated that modelers could potentially  
505 allow for predictable shifts in  $g_s$  under water stress but also flooded conditions, combined with the  
506 use of single coefficient conveying  $g_s$  sensitivity to VPD.

507 Woody species responses to flooding and flooding plus salinity are wide-ranging and can  
508 change based on the life-history stage of a plant. Seedlings are generally more sensitive to salinity  
509 while mature plants may show a wider range of tolerance (Kozlowski, 1997). However, when our  
510 field and greenhouse observations were analyzed together, some common responses were  
511 observed (Fig. 5), highlighting the need for integrating data on seedlings and mature plants in  
512 future studies on wetland adaptation to SLR and its restoration (Carmichael and Smith, 2016).

513

## 514 **Conclusion**

515 Our study provides new functional and mechanistic insights on plant hydraulics by showing that  
516 the components of  $K_{\text{plant}}$  are highly dynamic, reflecting a balance between species adaptive  
517 capacity and AQP functioning. Neither species tolerated flooding plus salinity. In loblolly pine,  
518 high water uptake was largely mediated by active transport through AQP, but was easily disrupted  
519 by drought, flooding and salinity. In bald cypress, a flooded-tolerant species, AQP contribution to  
520 water transport was less sensitive overall and did not respond to flooding. Under controlled  
521 conditions, AQP activity and xylem structure were colimiting root water transport. However, in  
522 response to environmental factors, except again for the flooding treatment in bald cypress, AQP  
523 functioning rather than changes in xylem structure or biomass allocation controlled the fluctuations

524 in  $K_{\text{root}}$ , and thus in  $K_{\text{plant}}$ . The decline in  $K_{\text{leaf}}$  was rather the consequence of both a decrease in  
525 AQP activity and in structural changes. An important challenge was also to integrate the AQP-  
526 mediated reduction in  $K_{\text{root}}$  within the mutual interactions of roots and shoots and its putative effect  
527 on gas exchange. As such, across species and treatments, the reduction in  $g_s$  and its sensitivity to  
528 VPD appeared to be direct responses to decreased  $K_{\text{plant}}$  and was influenced by AQP contribution  
529 to water transport.

530

### 531 **Data availability statement**

532

533 The data supporting the findings of this study are available from the corresponding author (Jean-  
534 Christophe Domec) upon request.

535

536 **Funding information:** This work was supported by a grant USDA-AFRI (#2012-00857), the  
537 National Science Foundation - Division of Integrative Organismal Systems (#1754893), and by  
538 the ANR projects CWSSEA- SEA-Europe, and PRIMA-SWATCH. The USFWS Alligator River  
539 National Wildlife Refuge provided the forested wetland research site, and in-kind support of field  
540 operations.

541

542 **Author contributions:** J.-C.D. and D.M.J. conceived the original screening and research plans;  
543 J.-C.D., D.M.J., R.W. and M.J.C. performed the hydraulics experiments, A.T.O., M.J.C. and R.W.  
544 performed the gas exchange experiments; J.S.K., J.-C.D., A.N., and G.M. performed field  
545 experiments; W.K.S. provided plant materials; J.-C.D. and D.M.J. analyzed the data and wrote the  
546 article with contributions of all the authors.

547

### 548 **References**

549 **Addington RN, RJ Mitchell, R Oren and LA. Donovan** (2004) Stomatal sensitivity to vapor  
550 pressure deficit and its relationship to hydraulic conductance in *Pinus palustris*. *Tree Physiology*  
551 **24**:561–569.

552

553 **Allen JA, Pezeshki S R, Chambers J L** (1996) Interactions of flooding and salinity stress on  
554 baldcypress (*Taxodium distichum*). *Tree Physiology* **16**: 307-313.

555

556 **Almeida-Rodriguez A.M., Hacke U.G, Laur J.** (2011) Influence of evaporative demand on  
557 aquaporin expression and root hydraulics of hybrid poplar. *Plant, Cell Environ* **34**:1318-1331

558

559 **Azaizeh H and E Steudle** (1991) Effects of salinity on water transport of excised maize (*Zea mays*  
560 L.) roots. *Plant Physiology* **97**: 1136–1145.

561

- 562 **Bhattachan A ., R. E. Emanuel, M. Ardón, E. Bernhardt, S.M. Anderson, M.G. Stillwagon**  
563 **E.A. Ury, T.K. BenDor, and J. P. Wright** (2018). Evaluating the effects of land-use change  
564 and future climate change on vulnerability of coastal landscapes to salwater intrusion. *Elementa*  
565 *Sciences of the Anthropocene* **6**:62.  
566
- 567 **Bramley H, Turner NC, Turner DW, Tyerman SD. 2009.** Roles of morphology, anatomy, and  
568 aquaporins in determining contrasting hydraulic behavior of roots. *Plant Physiology* **150**, 348–  
569 364.  
570
- 571 **Brodersen CR, Germino MJ, Johnson DM, Reinhardt K, Smith WK, Resler LM, Bader**  
572 **MY, Sala A, Kueppers LM, Broll G, Cairns DM, Holtmeier F-K and Wieser G** (2019)  
573 Seedling Survival at Timberline Is Critical to Conifer Mountain Forest Elevation and Extent.  
574 *Front. For. Glob. Change* **2**:9. DOI: [10.3389/ffgc.2019.00009](https://doi.org/10.3389/ffgc.2019.00009)  
575
- 576 **Brodribb TJ and NM Holbrook** (2003) Stomatal closure during leaf dehydration, correlation  
577 with other leaf physiological traits. *Plant Physiology* **132**, 2199-2173.  
578
- 579 **Carmichael MJ and Smith WK** (2016) Growing season ecophysiology of *Taxodium distichum*  
580 (L.) Rich. (bald cypress) saplings in a restored wetland: a baseline for restoration practice. *Botany*  
581 **94**: 1115-1125. DOI: [10.1139/cjb-2016-0147](https://doi.org/10.1139/cjb-2016-0147).  
582
- 583 **Castonguay Y., Nadeau P, Simard R.R** (1993) Effects of flooding on carbohydrate and ABA  
584 levels in roots and shoots of alfalfa, *Plant Cell Environ* **16**: 695-702.  
585
- 586 **Chaumont F, Moshelion M, Daniels MJ.** 2005. Regulation of plant aquaporin activity. *Biology*  
587 *of the Cell* **97**: 749–764  
588
- 589 **Church JA, P Huybrechts, M Kuhn, K Lambeck, MT Nhuan, D Qin and PL Woodworth.**  
590 (2001) Changes in sea level. In: Houghton, J.T., Ding, Y., Griggs, D.J., Noguer, N., Van der  
591 Linden, P.J. & Xiaou, D. (eds.) *Climate change 2001: The scientific basis*. Cambridge University  
592 Press, Cambridge, UK.  
593
- 594 **DeSantis LRG, Bhotika S, Williams K, Putz FE** (2007) Sea-level rise and drought interactions  
595 accelerate forest decline on the Gulf Coast of Florida, USA. *Global Change Biology* **13**: 2349-  
596 2360.  
597
- 598 **Domec J-C, A Noormets, JS King, G Sun G, SG McNulty et al.** (2009) Decoupling the influence  
599 of leaf and root hydraulic conductances on stomatal conductance and its sensitivity to vapor  
600 pressure deficit as soil dries in a drained loblolly pine plantation. *Plant, Cell Environ* **32**:980-991.  
601
- 602 **Domec J.C., J. S King, E. Ward, A. C. Oishi, S. Palmroth, A. Radecki, D. M. Bell, G. Miao,**  
603 **M. Gavazzi, D. M. Johnson, S.G. McNulty, G. Sun, A. Noormets** (2015) Conversion of natural  
604 forests to managed forest plantations decreases tree resistance to prolonged droughts. *Forest*  
605 *Ecology and Management* **355**:58-71.  
606



- 607 **Domec, J.-C., Palmroth S., Oren. R** (2016) Effects of *Pinus taeda* leaf anatomy on vascular and  
608 extravascular leaf hydraulic conductance as influenced by N-fertilization and elevated CO<sub>2</sub>. Journal  
609 of Plant Hydraulics **3**e007.  
610
- 611 **Ehlert C, C Maurel, F Tardieu and C Simonneau** (2009) Aquaporin-Mediated Reduction in  
612 Maize Root hydraulic conductivity impacts cell turgor and leaf elongation even without changing  
613 transpiration. Plant Physiology **150**: 1093-1104.  
614
- 615 **Else M.A., Coupland D., Dutton L. & Jackson M.B** (2001) Decreased root hydraulic  
616 conductivity reduces leaf water potential, initiates stomatal closure and slows leaf expansion in  
617 flooded plants of castor oil (*Ricinus communis*) despite diminished delivery of ABA from the roots  
618 to shoots in xylem sap. Physiologia Plantarum **111**, 46– 54.  
619
- 620 **Farquhar, G.D., S. von Caemmerer and J.A. Berry** (1980) A biochemical model of  
621 photosynthetic CO<sub>2</sub> fixation in leaves of C<sub>3</sub> species. Planta **149**, 78-90  
622
- 623 **Gambetta G.A., Fei J., Rost T.L., Knipfer T., Matthews M.A., Shackel K.A., Walker M.A.,**  
624 **McElrone A.J.** (2013) Water uptake along the length of grapevine fine roots: developmental  
625 anatomy, tissue-specific aquaporin expression, and pathways of water transport. Plant Physiology  
626 **163**, 1254–1265.  
627
- 628 **Gambetta GA, Knipfer T, Fricke W, McElrone AJ** (2017) Aquaporins and root water uptake.  
629 In: F Chaumont, S Tyerman (eds) Plant Aquaporins, Signaling and Communication in Plants.  
630 Springer Verlag Berlin, Heidelberg, pp 133– 153  
631
- 632 **Hacke UG, JS Sperry, BE Ewers, DS Ellsworth, KVR Schäfer, and R Oren** (2000) Influence  
633 of soil porosity on water use in *Pinus taeda*. Oecologia **124**:495-505.  
634
- 635 **Henzler T, Steudle E.** 2004. Oxidative gating of water channels (aquaporins) in *Chara* by  
636 hydroxyl radicals. Plant Cell & Environment **27**: 1184-1195.  
637
- 638 **Holbrook NM and MA Zwieniecki** (2003) Plant biology: water gate. Nature **425**:361  
639
- 640 **Johnson D.M., M. Sherrard, J.C. Domec, R.B. Jackson** (2014) Role of aquaporin activity in  
641 regulating deep and shallow root hydraulic conductance during extreme drought. Tree Structure  
642 and Function **28**:1223-1331.  
643
- 644 **Johnson D.M., Wortemann R., McCulloh K.A., Jordan-Meille L., Ward E., Warren J.M.,**  
645 **Palmroth S., Domec J.-C.** (2016) A test of the hydraulic vulnerability segmentation hypothesis  
646 in angiosperm and conifer tree species. Tree Physiology **36**: 983-993.  
647
- 648 **Kamaluddin M and JJ Zwiazek** (2002) Ethylene enhance water transport in hypoxic aspen. Plant  
649 Physiology **128**:962-969.  
650

- 651 **Keeland, BD and R R Sharitz** (1995). Seasonal growth patterns of *Nyssa sylvatica* var. biflora,  
652 *Nyssa aquatica*, and *Taxodium distichum* as affected by hydrologic regime. Canadian Journal of  
653 Forest Research **25**:1084–1096.  
654
- 655 **Kirwan ML, Gedan KF** (2019) Sea-level driven land conversion and the formation of ghost  
656 forests. Nature Climate Change: **9**: 450-457.  
657
- 658 **Knifer T and Fricke W** (2011) Water uptake by seminal and adventitious roots in relation to  
659 whole-plant water flow in barley (*Hordeum vulgare* L.). Journal Experimental Botany **62**:717-  
660 33.  
661
- 662 **Kozlowski TT.** (1997) Responses of woody plants to flooding and salinity. Tree Physiology  
663 Monograph **1**:1–29.  
664
- 665 **Krauss KW, JL Chambers, JA Allen, B Luse and A DeBosier.** (1999) Root and shoot responses  
666 of *Taxodium distichum* seedlings subjected to saline flooding. Environmental and Experimental  
667 Botany **41**:15-23.  
668
- 669 **Leyton L and Z Rousseau.** (1958) Root growth of tree seedlings in relation to aeration. In:  
670 Thimann, K.V. (ed.), The physiology of forest trees. Ronald Press, New York. p. 467–475.  
671
- 672 **Li X., X. Wang, Y. Yang, R. Li, Q. He, X. Fang, D. Luu, C. Maurel, J. Lin** (2011) Single-  
673 Molecule Analysis of PIP2;1 Dynamics and Partitioning Reveals Multiple Modes of *Arabidopsis*  
674 Plasma Membrane Aquaporin Regulation. The Plant Cell **23** :3780-3797  
675
- 676 **Loustau D, S Crepeau, MG Guye, M Sartore, E Saur.** (1995) Growth and water relations of  
677 three geographically separate origins of maritime pine (*Pinus pinaster*) under saline conditions.  
678 Tree Physiology **15**: 569-576  
679
- 680 **Martinez-Ballesta M.C., Martinez V., Carvajal M** (2000) Regulation of water channel activity  
681 in whole roots and in protoplasts from roots of melon plants grown under saline conditions.  
682 Australian Journal of Plant Physiology **27**, 685–691.  
683
- 684 **Maurel C, Nacry P** (2020) Root architecture and hydraulics converge for acclimation to changing  
685 water availability. Nature Plants **6**:744–749.  
686
- 687 **McCulloh K., Domec J-C, Johnson D.M., Smith D.D., Meinzer F.C.** (2019) A dynamic yet  
688 vulnerable pipeline: Integration and coordination of hydraulic traits across whole plants. Plant,  
689 Cell & Environment **42**: 2789-2807 DOI: 10.1111/pce.13607.  
690
- 691 **McElrone A. J., Bichler, J., Pockman, W. T., Addington, R. N., Linder, C. R., & Jackson, R.**  
692 **B.** (2007). Aquaporin-mediated changes in hydraulic conductivity of deep tree roots accessed via  
693 caves. Plant, Cell & Environment **30**, 1411–1421.  
694

- 695 **McLean E.H., Ludwig, M., Grierson, P. F.** 2011. Root hydraulic conductance and aquaporin  
696 abundance respond rapidly to partial root-zone drying events in a riparian *Melaleuca* species. *New*  
697 *Phytologist*. **192**, 664–675.  
698
- 699 **McLeod KW, JK McCarron, and WH Conner** (1996) Effects of flooding and salinity on  
700 photosynthesis and water relations of four Southeastern Coastal Plain forest species. *Wetlands*  
701 *Ecology and Management* **4**: 31-42.  
702
- 703 **Megonigal JP and FP Day** (1992) Effects of flooding on root and shoot production of bald cypress  
704 in large experimental enclosures. *Ecology* **73**: 1182-1193.  
705
- 706 **Meinzer FC** (2003) Functional convergence in plant responses to the environment. *Oecologia*  
707 **134**:1-11.  
708
- 709 **Miao, G., Noormets, A., Domec, J.-C., Trettin, C.C., McNulty, S.G., Sun, G., King, J.S** (2013)  
710 The effect of water table fluctuation on soil respiration in a lower coastal plain forested wetland in  
711 the southeastern US. *J. Geophys. Res.: Biogeosci.* **118**, 1748–1762.  
712
- 713 **Munns R** (2002) Comparative physiology of salt and water stress. *Plant Cell Envir* **25**:239–50.  
714
- 715 **Munns R and M Tester** (2008) Mechanisms of salinity tolerance. *Annu. Rev. Plant Biol.* 2008.  
716 **59**:651–81  
717
- 718 **NAS** (2020) *Climate Change: Evidence and Causes: Update 2020*. Washington, DC: The National  
719 Academies Press. 36p. <https://doi.org/10.17226/25733>.  
720
- 721 **Niinemets U** (2010) Responses of forest trees to single and multiple environmental stresses from  
722 seedlings to mature plants: Past stress history, stress interactions, tolerance and acclimation. *Forest*  
723 *Ecology and Management* **260**: 1623-1639.  
724
- 725 **Oppenheimer, M., B.C. Glavovic , J. Hinkel, R. van de Wal, A.K. Magnan, A. Abd-Elgawad,**  
726 **R. Cai, M. Cifuentes-Jara, R.M. DeConto, T. Ghosh, J. Hay, F. Isla, B. Marzeion, B.**  
727 **Meyssignac, and Z. Sebesvari.** (2019) Sea Level Rise and Implications for Low-Lying Islands,  
728 Coasts and Communities. In: IPCC Special Report on the Ocean and Cryosphere in a Changing  
729 Climate [H.-O. Pörtner, D.C. Roberts, V. Masson-Delmotte, P. Zhai, M. Tignor, E. Poloczanska,  
730 K. Mintenbeck, A. Alegría, M. Nicolai, A. Okem, J. Petzold, B. Rama, N.M. Weyer (eds.)].  
731
- 732 **Oren R, Sperry JS, Katul GG, Pataki DE, Ewers BE, Phillips N and KVR. Schäfer** (1999)  
733 Survey and synthesis of intra- and interspecific variation in stomatal sensitivity to vapour pressure  
734 deficit. *Plant Cell Environment* **22**:1515–1526.  
735
- 736 **Peltier WR** (2002) On eustatic sea level history: last glacial maximum to Holocene. *Quaternary*  
737 *Science Reviews* **21**: 377-396.  
738
- 739 **Pezeshki SR** (1992) Response of *Pinus taeda* to soil flooding and salinity. *Annales des Sciences*  
740 *Forestières* **4**: 149-159.

- 741  
742 **Poulter B, NL Christensen and Q.S. Song** (2008) Tolerance of *Pinus taeda* and *Pinus serotina*  
743 to low salinity and flooding: Implications for equilibrium vegetation dynamics. *Journal of*  
744 *Vegetation Science* **19**: 15-22.  
745
- 746 **Rodríguez-Gamir, J., Ancillo, G., Legaz, F., Primo-Millo, E. & Forner-Giner, M.A** (2012)  
747 Influence of salinity on PIP gene expression in citrus roots and its relationship with root hydraulic  
748 conductance, transpiration and chloride exclusion from leaves. *Environmental and experimental*  
749 *botany* **78**, 163–166  
750
- 751 **Rodríguez-Gamir J., Xue J., Clearwater M.J., Meason D.F., Clinton P.W. & Domec J.-C**  
752 (2019) Aquaporin regulation in roots controls plant hydraulic conductance, stomatal conductance  
753 and leaf water potential in *Pinus radiata* under water stress. *Plant, Cell & Environment* **42**:717-  
754 729. DOI: 10.1111/pce.13460.  
755
- 756 **Ross MS and JJ O'Brien** (1994) Sea-level rise and the reduction in pine forests in the Florida  
757 Keys. *Ecological Applications* **4**:144-156.  
758
- 759 **Siefritz F, MT Tyree, C Lovisolo, A Schubert and R Kaldenhoff** (2002) PIP1 plasma membrane  
760 aquaporins in tobacco; from cellular effects to function in plants. *The Plant cell* **14**:869-876.  
761
- 762 **Sperry JS.** (2003) Evolution of water transport and xylem structure. *International Journal of Plant*  
763 *Science* **164**: 115–127.  
764  
765
- 766 **Tan X, Zwiazek JJ.** (2019) Stable expression of aquaporins and hypoxia-responsive genes in  
767 adventitious roots are linked to maintaining hydraulic conductance in tobacco (*Nicotiana tabacum*)  
768 exposed to root hypoxia. *PLoS One.* **14**(2):e0212059.  
769
- 770 **Titus JG and C. Richman** (2001) Maps of lands vulnerable to sea level rise: modeled elevations  
771 along the US Atlantic and Gulf coasts. *Climate Research* **18**: 205-228.  
772
- 773 **Törnroth-Horsefield S, Y Wang, K Hedfalk, U Johanson, M Karlsson, E Tajkhorshid, R**  
774 **Neutze and P. Kjellbom** (2006) Structural mechanism of plant aquaporin gating. *Nature* **439**:688-  
775 694  
776
- 777 **Tyree MT, Sinclair B, Lu P, Granier A.** 1993. Whole shoot hydraulic conductance in *Quercus*  
778 species measured with a new high-pressure flow meter. *Ann. For Sc.* **50**: 417-423.  
779
- 780 **Tyree MT and MH. Zimmermann** (2002) *Xylem Structure and the Ascent of Sap* (second ed),  
781 Springer, New York, NY.  
782
- 783 **Vandeleur, R. K., Sullivan, W., Athman, A., Jordans, C., Gilliam, M., Kaiser, B. N., &**  
784 **Tyerman, S. D** (2014). Rapid shoot-to-root signalling regulates root hydraulic conductance via  
785 aquaporins. *Plant, Cell & Environment* **37**, 520–538. <https://doi.org/10.1111/pce.12175>  
786

- 787 **Ward, E.J., Oren, R., Bell, D.M., Clark, J.S., McCarthy, H.R., Seok-Kim, H., Domec, J.-C**  
788 (2013) The effects of elevated CO<sub>2</sub> and nitrogen fertilization on stomatal conductance estimated  
789 from scaled sapflux measurements at Duke FACE. *Tree Physiol* **33**, 135–151.  
790
- 791 **Yang, S. and M.T. Tyree** (1994) Hydraulic architecture of *Acer saccharum* and *A. rubrum*:  
792 comparison of branches to whole trees and the contribution of leaves to hydraulic resistance. *J.*  
793 *Exp. Bot.* **45**:179-186.  
794
- 795 **Ye, Q., & Steudle, E** (2006). Oxidative gating of water channels (aquaporins) in corn roots. *Plant,*  
796 *Cell & Environment* **29**, 459–470. <https://doi.org/10.1111/j.1365-3040.2005.01423.x>  
797
- 798 **Zhang J., Zhang X** (1994) Can early wilting of old leaves account for much of the ABA  
799 accumulation in flooded leaves? *J. Exp. Bot.* **45**: 1335-1342.  
800

801 **Figure captions**

802 Figure 1: Mean values (+SE) of hydraulic conductances (solid bars) in root, shoot and whole  
803 loblolly pine (n=6) and bald cypress (n=5) plants growing in control, droughted, flooded and  
804 flooded + salt conditions. Crosses indicate a significant difference between control and any of the  
805 treatments ( $p<0.05$ ). Hashed bars represent values of hydraulic conductance following aquaporin  
806 inhibition i.e. the xylem-only part of the hydraulic pathway.

807

808 Figure 2: Partitioning of hydraulic resistances (1/conductance) of loblolly pine and bald cypress  
809 organs in control, flooded and flooded + salt conditions. Note that in all cases root and leaves  
810 represented more than 70% of total whole plant resistance.

811

812 Figure 3: Effect (shown in percent) of either the xylem-only (structural changes in xylem conduits)  
813 or the aquaporin-only (AQP) part of the hydraulic pathway on the decrease in loblolly pine and  
814 bald cypress hydraulic conductance between control and drought, flooded, and flooded plus  
815 salinity treatments (absolute values of conductances are seen in Fig. 1). For a given stress applied,  
816 the structural part of the hydraulic pathway reducing conductance was calculated by dividing the  
817 difference in conductance between control and treatment after inhibiting AQP activity by the  
818 difference in conductance between control and treatment without inhibiting AQP activity. The  
819 AQP effect was taken as 1 minus the structural effect. Bars with patterns represent treatments that  
820 did not induce significant difference in conductance ( $p>0.05$ ; flooded condition for bald cypress).

821

822 Figure 4: Aquaporin (AQP) contribution to root, stem, leaf and whole-plant hydraulic  
823 conductances in (A) loblolly pine (n=6, +SE) and (B) bald cypress seedlings (n=5, +SE) growing  
824 under control, water-stressed, flooded, and flooded plus salinity conditions. Crosses indicate a  
825 significant difference in whole-plant AQP contribution between control and any of the treatments  
826 ( $p<0.05$ ).

827

828 Figure 5: (A) Linear relationship between the maximum (reference) stomatal conductance ( $g_s$  at  
829 vapor pressure deficit = 1 kPa) and (B) plant hydraulic conductance ( $K_{plant}$ ) and between the  
830 sensitivity of stomatal conductance to vapor pressure deficit ( $dg_s/d\ln VPD$ ) and  $g_{s-max}$  of plant  
831 species growing under control, water-stressed, flooded, and flooded plus salinity conditions.

832 Circles, diamonds, squares and triangles represent bald cypress, water tupelo, loblolly pine and red  
833 maple, respectively. Crossed-filled symbols represent mature plants growing in the field, non-  
834 crossed symbols represent bald cypress and loblolly pine seedlings from the greenhouse  
835 experiment. In (B), the red line (slope = 0.6) indicates the theoretical slope between stomatal  
836 conductance at VPD = 1 kPa and stomatal sensitivity to VPD that is consistent with the role of  
837 stomata in regulating minimum leaf water potential (Oren et al. 1999).

838  
839 Figure 6: Maximum stomatal conductance ( $g_{s-max}$ ) and the sensitivity of stomatal conductance to  
840 vapor pressure deficit ( $dg_s/dlnVPD$ ) versus percent of hydraulic resistance in roots of bald cypress  
841 (Bald.) and loblolly pine (L.-Pine) seedlings growing under control, water-stressed, flooded, and  
842 flooded plus salinity conditions.

843  
844 Figure 7: Maximum stomatal conductance ( $g_{s-max}$ ) and Light saturated photosynthetic rate ( $A_{sat}$ )  
845 versus aquaporin (AQP) contribution to root, or whole-plant hydraulic conductances of bald  
846 cypress (Bald.) and loblolly pine (L.-Pine) seedlings growing under control, water-stressed,  
847 flooded, and flooded plus salinity conditions.

Table 1. Plant, root (fine and coarse), stem and leaf dry masses (g), as well as mean tracheid diameters (Dt\_stem; Dt\_root), fine-root to leaf mass ratio (Root\_fine/Leaf), and leaf mass per area (LMA) for the different treatments of *Taxodium distichum* (n=5, +SE) and *Pinus taeda* (n=6, +SE). The presence (Yes - and the percentage of roots affected) or absence (No) of root aerenchyma (intercellular air spaces) observed 5 weeks after initiating the treatments is also indicated.

|                           | Control             |                 | Drought             |                 | Flooded             |                 | Flooded plus Salt   |                 |
|---------------------------|---------------------|-----------------|---------------------|-----------------|---------------------|-----------------|---------------------|-----------------|
|                           | <i>T. distichum</i> | <i>P. taeda</i> | <i>T. distichum</i> | <i>P. taeda</i> | <i>T. distichum</i> | <i>P. taeda</i> | <i>T. distichum</i> | <i>P. taeda</i> |
| Plant (g)                 | 13.9 ± 1.1C         | 10.7 ± 0.4B     | 9.9 ± 0.9AB         | 9.1 ± 0.4A      | 11.7 ± 1.0BC        | 9.5 ± 0.6A      | 9.7 ± 0.8AB         | 7.9 ± 0.8A      |
| Root (g)                  | 6.1 ± 0.4B          | 4.7 ± 0.4A      | 4.4 ± 0.5A          | 4.2 ± 0.3A      | 5.0 ± 0.6AB         | 4.9 ± 0.4A      | 3.9 ± 0.5A          | 4.3 ± 0.3A      |
| Stem (g)                  | 5.4 ± 0.5D          | 2.9 ± 0.2B      | 3.3 ± 0.3C          | 2.2 ± 0.1A      | 3.9 ± 0.4 C         | 1.9 ± 0.2 A     | 2.8 ± 0.2B          | 1.8 ± 0.1A      |
| Leaf (g)                  | 2.4 ± 0.6AB         | 3.1 ± 0.4B      | 2.2 ± 0.4B          | 2.6 ± 0.3B      | 2.8 ± 0.8AB         | 2.7 ± 0.3B      | 2.9 ± 0.7AB         | 1.7 ± 0.3A      |
| Dt_stem (µm)              | 23.1±3.8C           | 14.8±2.1B       | 19.9±2.2C           | 9.4±1.2A        | 22.6±4.1C           | 13.6±1.5AB      | 17.8±2.2BC          | 10.2±1.5A       |
| Dt_root (µm)              | 12.3±0.9C           | 10.2±1.0BC      | 11.8±1.3C           | 8.8±0.8AB       | 13.3±1.6C           | 9.0±0.6B        | 10.7±1.1BC          | 7.6±0.5A        |
| Aerenchyma                | Yes – 38 %          | No              | No                  | No              | Yes – 84 %          | No              | Yes – 24 %          | No              |
| Root_fine/Leaf            | 0.72 ± 0.09B        | 0.53 ± 0.05A    | 0.74 ± 0.10B        | 0.50 ± 0.06A    | 0.71 ± 0.12AB       | 0.67 ± 0.04B    | 0.48 ± 0.07A        | 0.79 ± 0.9B     |
| LMA (g cm <sup>-2</sup> ) | 9.1 ± 0.9B          | 13.4 ± 0.7D     | 7.0 ± 0.6A          | 11.8 ± 0.5C     | 8.9 ± 1.0B          | 11.4 ± 0.8C     | 7.2 ± 0.4A          | 9.0 ± 0.6B      |

Values in horizontal sequences not followed by the same letter are significantly different at the 0.05 level.



Table 2: Mean root hydraulic conductance on a root-mass basis ( $K_{\text{root\_biomass}}$ ), root hydraulic conductance on a root-mass basis after inhibiting aquaporin (AQP) activity (AQP-inhibited  $K_{\text{root\_biomass}}$ ), leaf water potentials ( $\Psi_{\text{leaf}}$ ), stomatal conductance, light saturated photosynthesis, and photosynthetic parameters at 25°C ( $VC_{\text{max}25}$ ,  $J_{\text{max}25}$ ,  $R_{\text{d}25}$ ) for the different treatments of *Taxodium distichum* and *Pinus taeda*. Values are means +SE (n=5-6).

|                                                                                                     | Control             |                 | Drought             |                 | Flooded             |                 | Flooded plus Salt   |                 |
|-----------------------------------------------------------------------------------------------------|---------------------|-----------------|---------------------|-----------------|---------------------|-----------------|---------------------|-----------------|
|                                                                                                     | <i>T. distichum</i> | <i>P. taeda</i> | <i>T. distichum</i> | <i>P. taeda</i> | <i>T. distichum</i> | <i>P. taeda</i> | <i>T. distichum</i> | <i>P. taeda</i> |
| $K_{\text{root\_biomass}}$<br>( $\text{g kg}^{-1} \text{ s}^{-1} \text{ MPa}^{-1}$ )                | 8.6 ± 0.3C          | 9.6 ± 1.1C      | 5.9 ± 0.4B          | 4.6 ± 0.7A      | 8.0 ± 1.2C          | 5.4 ± 0.7AB     | 5.0 ± 1.4AB         | 3.3 ± 1.2A      |
| AQP-inhibited $K_{\text{root\_biomass}}$<br>( $\text{g kg}^{-1} \text{ s}^{-1} \text{ MPa}^{-1}$ )  | 3.9 ± 0.3A          | 5.6 ± 0.7B      | 4.0 ± 0.1A          | 3.8 ± 0.7A      | 3.4 ± 0.4A          | 5.1 ± 0.6B      | 3.7 ± 0.5A          | 3.1 ± 0.7A      |
| Predawn water potential<br>(MPa)                                                                    | -0.32 ± 0.02B       | -0.24 ± 0.01A   | -0.78 ± 0.07C       | -0.93 ± 0.08C   | -0.31 ± 0.02B       | -0.39 ± 0.05B   | -0.71 ± 0.09C       | -0.77 ± 0.09C   |
| Midday water potential<br>(MPa)                                                                     | -0.70 ± 0.08A       | -1.18 ± 0.07B   | -0.94 ± 0.09A       | -1.29 ± 0.07B   | -0.78 ± 0.09A       | -1.22 ± 0.11B   | -0.98 ± 0.06A       | -1.38 ± 0.10B   |
| Stomatal conductance<br>( $g_{\text{s\_max}}$ , $\text{mmol m}^{-2} \text{ s}^{-1}$ )               | 124 ± 13E           | 93 ± 6D         | 92 ± 11D            | 41 ± 5B         | 115 ± 7DE           | 61 ± 6C         | 49 ± 9BC            | 25 ± 3A         |
| Light saturated photosynthetic rate<br>( $A_{\text{sat}}$ , $\mu\text{mol m}^{-2} \text{ s}^{-1}$ ) | 7.0 ± 0.5C          | 6.1 ± 0.4C      | 4.2 ± 0.5B          | 4.3 ± 0.6B      | 6.2 ± 0.7C          | 4.4 ± 0.8B      | 3.3 ± 0.5B          | 1.8 ± 0.2A      |
| Rubisco carboxylation capacity<br>( $VC_{\text{max}25}$ , $\mu\text{mol m}^{-2} \text{ s}^{-1}$ )   | 44.9 ± 6.2D         | 33.2 ± 5.2CD    | 25.3 ± 3.4BC        | 21.7 ± 2.5B     | 34.9 ± 3.8CD        | 26.0 ± 1.6B     | 10.8 ± 2.4A         | 6.1 ± 0.9A      |
| Maximum electron transport rate<br>( $J_{\text{max}25}$ , $\mu\text{mol m}^{-2} \text{ s}^{-1}$ )   | 66.3 ± 5.6D         | 52.3 ± 4.1C     | 39.1 ± 3.2B         | 32.5 ± 3.3B     | 55.7 ± 6.1CD        | 38.6 ± 5.2B     | 29.6 ± 6.6B         | 13.3 ± 1.4A     |
| Dark respiration rate<br>( $R_{\text{d}25}$ , $\mu\text{mol m}^{-2} \text{ s}^{-1}$ )               | 0.22 ± 0.04BC       | 0.27 ± 0.04C    | 0.19 ± 0.04B        | 0.17 ± 0.02B    | 0.19 ± 0.02B        | 0.23 ± 0.04BC   | 0.12 ± 0.02A        | 0.10 ± 0.01A    |

Values in horizontal sequences not followed by the same letter are significantly different at the 0.05 level.

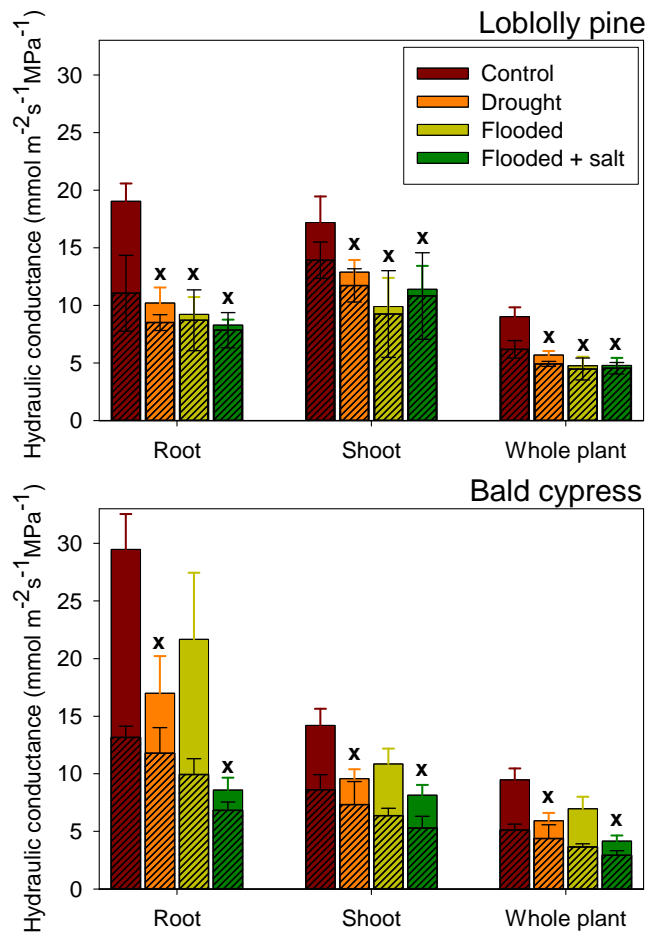

Figure 1: Mean values (+SE) of hydraulic conductances (solid bars) in root, shoot and whole loblolly pine (n=6) and bald cypress (n=5) plants growing in control, droughted, flooded and flooded + salt conditions. Crosses indicate a significant difference between control and any of the treatments ( $p < 0.05$ ). Hashed bars represent values of hydraulic conductance following aquaporin inhibition i.e. the xylem-only part of the hydraulic pathway.

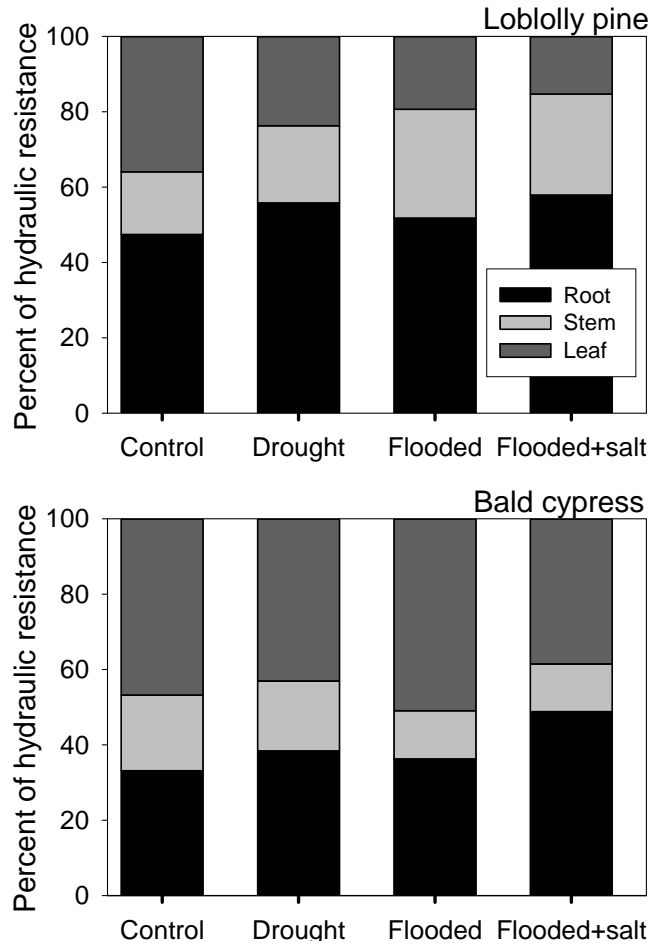

Figure 2: Partitioning of hydraulic resistances ( $1/\text{conductance}$ ) of loblolly pine and bald cypress organs in control, flooded and flooded + salt conditions. Note that in all cases root and leaves represented more than 70% of total whole plant resistance.

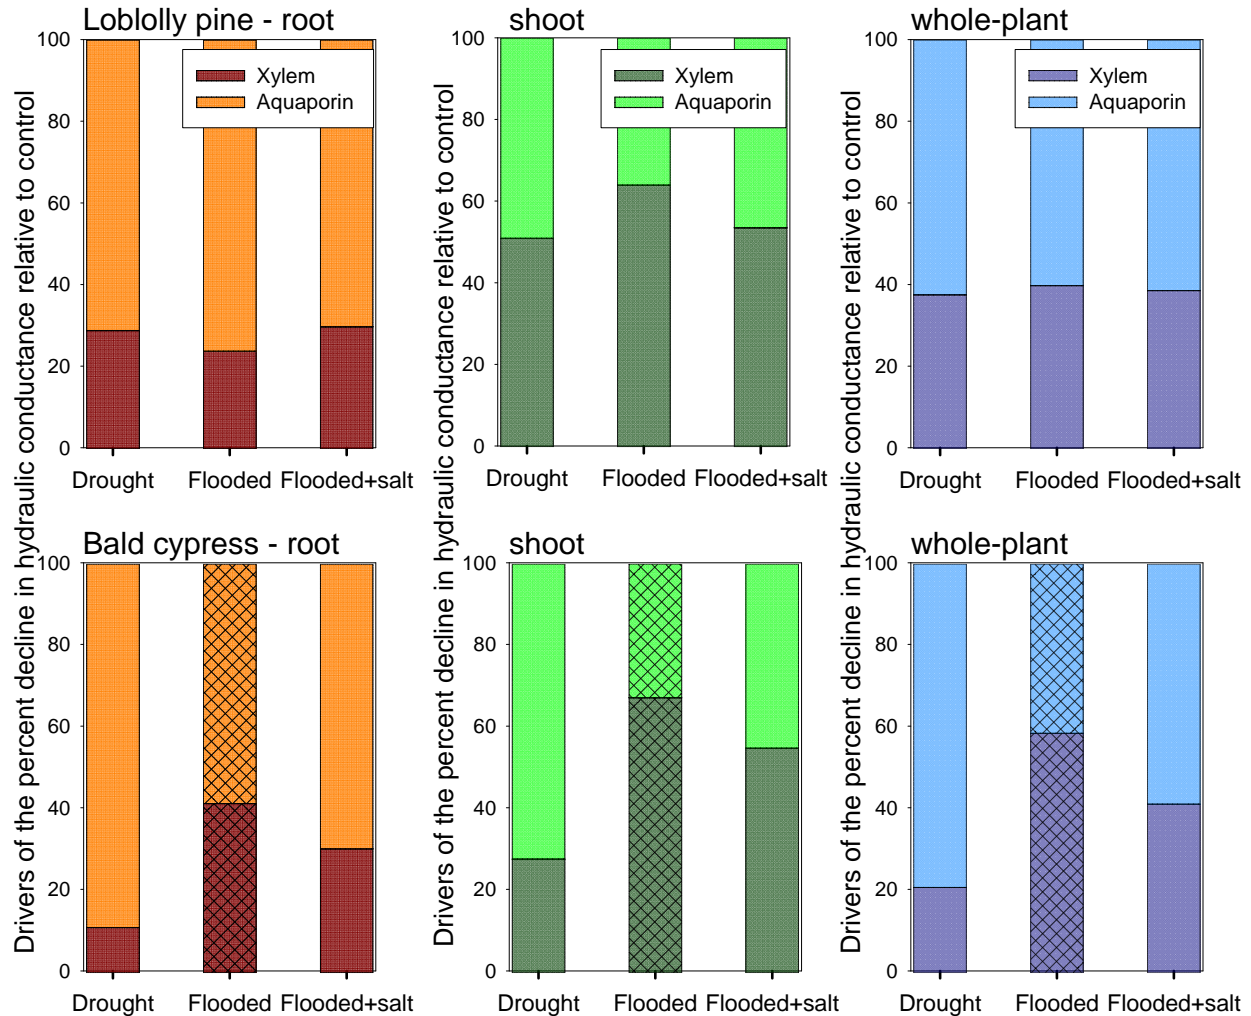

Figure 3: Effect (shown in percent) of either the xylem-only (structural changes in xylem conduits) or the aquaporin-only (AQP) part of the hydraulic pathway on the decrease in loblolly pine and bald cypress hydraulic conductance between control and drought, flooded, and flooded plus salinity treatments (absolute values of conductances are seen in Fig. 1). For a given stress applied, the structural part of the hydraulic pathway reducing conductance was calculated by dividing the difference in conductance between control and treatment after inhibiting AQP activity by the difference in conductance between control and treatment without inhibiting AQP activity. The AQP effect was taken as 1 minus the structural effect. Bars with patterns represent treatments that did not induce significant difference in conductance ( $p > 0.05$ ; flooded condition for bald cypress).

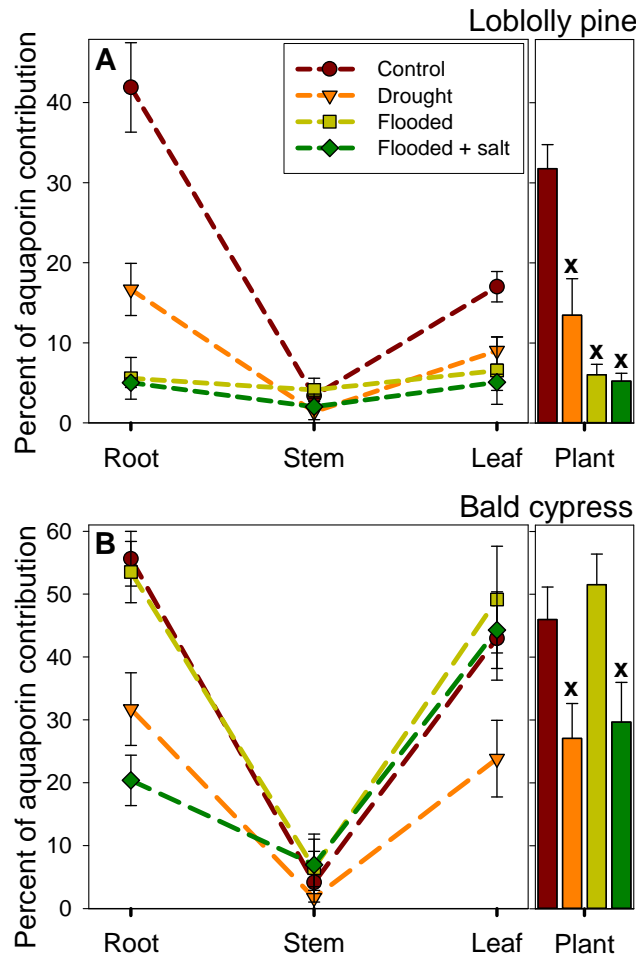

Figure 4: Aquaporin (AQP) contribution to root, stem, leaf and whole-plant hydraulic conductances in (A) loblolly pine (n=6, +SE) and (B) bald cypress seedlings (n=5, +SE) growing under control, water-stressed, flooded, and flooded plus salinity conditions. Crosses indicate a significant difference in whole-plant AQP contribution between control and any of the treatments ( $p < 0.05$ ).

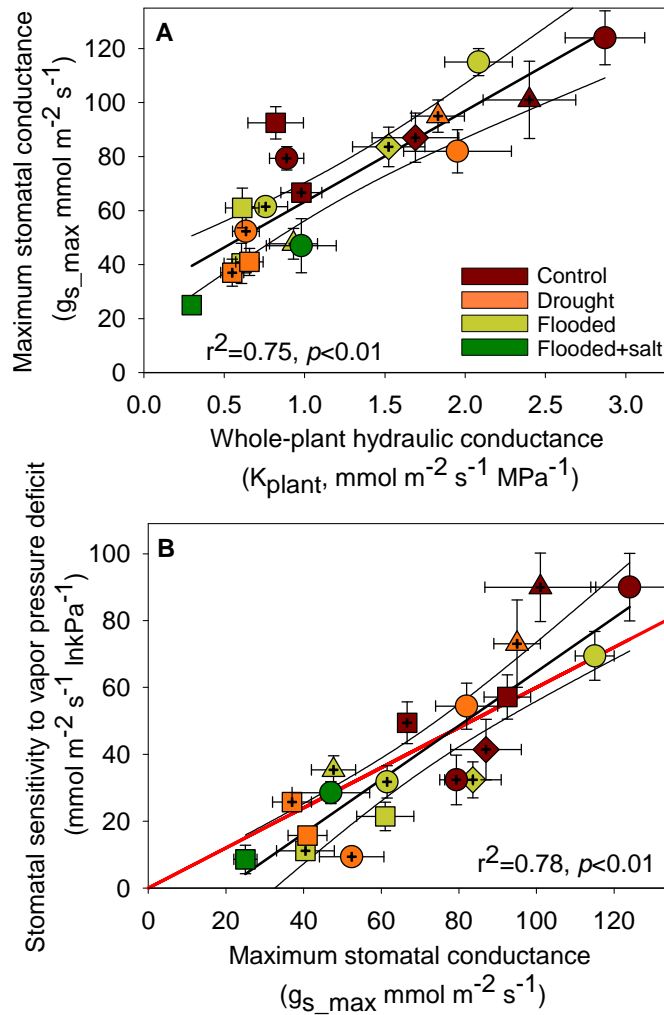

Figure 5: (A) Linear relationship between the maximum (reference) stomatal conductance ( $g_s$  at vapor pressure deficit = 1 kPa) and (B) plant hydraulic conductance ( $K_{plant}$ ) and between the sensitivity of stomatal conductance to vapor pressure deficit ( $dg_s/d\ln\text{VPD}$ ) and  $g_{s\_max}$  of plant species growing under control, water-stressed, flooded, and flooded plus salinity conditions. Circles, diamonds, squares and triangles represent bald cypress, water tupelo, loblolly pine and red maple, respectively. Crossed-filled symbols represent mature plants growing in the field, non-crossed symbols represent bald cypress and loblolly pine seedlings from the greenhouse experiment. In (B), the red line (slope = 0.6) indicates the theoretical slope between stomatal conductance at VPD = 1 kPa and stomatal sensitivity to VPD that is consistent with the role of stomata in regulating minimum leaf water potential (Oren et al. 1999).

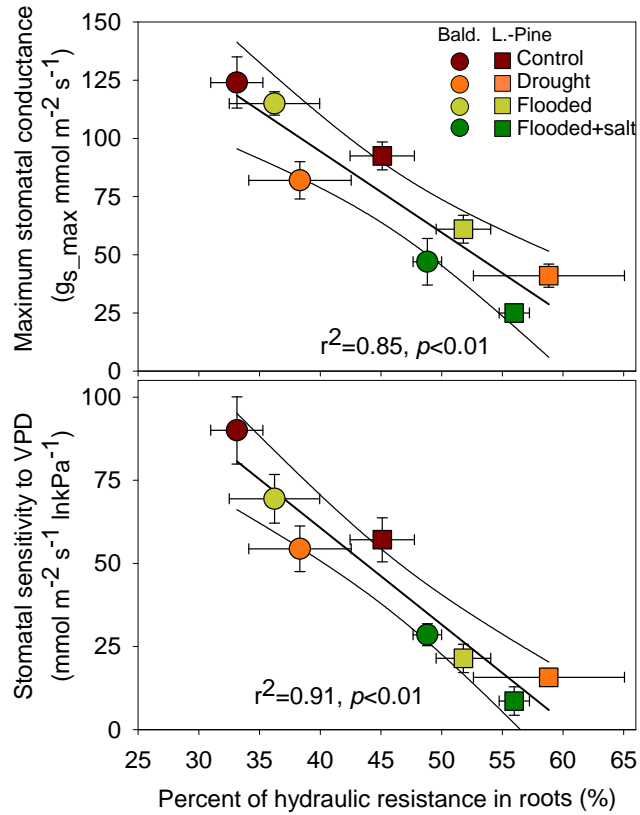

Figure 6: Maximum stomatal conductance ( $g_{s\_max}$ ) and the sensitivity of stomatal conductance to vapor pressure deficit ( $dg_s/d\ln VPD$ ) versus percent of hydraulic resistance in roots of bald cypress (Bald.) and loblolly pine (L.-Pine) seedlings growing under control, water-stressed, flooded, and flooded plus salinity conditions.

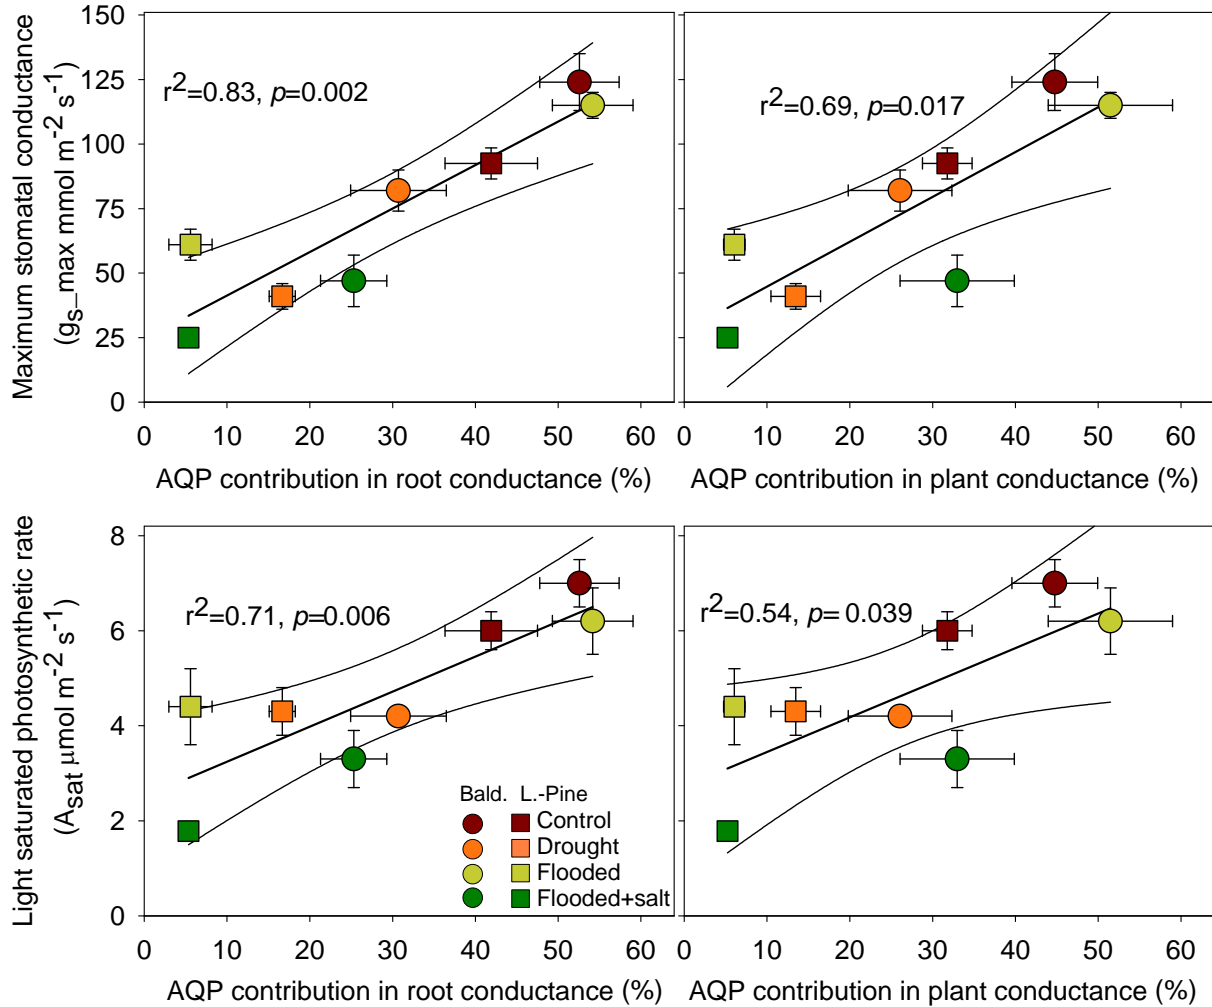

Figure 7: Maximum stomatal conductance ( $g_{s-max}$ ) and light saturated photosynthetic rate ( $A_{sat}$ ) versus aquaporin (AQP) contribution to root, or whole-plant hydraulic conductances of bald cypress (Bald.) and loblolly pine (L.-Pine) seedlings growing under control, water-stressed, flooded, and flooded plus salinity conditions.
